# Supplementary material for: Rapid and Quantitative Detection of Lung Cancer Biomarker ENOX2 Using a Novel Aptamer in an Electrochemical DNA-Based (E-DNA) Biosensor
Source: MDPI journal article supplement (doi:10.3390/bios13070675), 2023-06-25
Supplement: s1 [file s1]

Supplementary Data for “Rapid and quantitative detection of lung cancer biomarker ENOX2 using a novel aptamer in an electrochemical DNA-based (E-DNA) biosensor”.

Mary Quansah, Lisa Fetter, Autumn Fineran, Haley V. Colling, Keaton Silver, Teisha J. Rowland, and Andrew J. Bonham

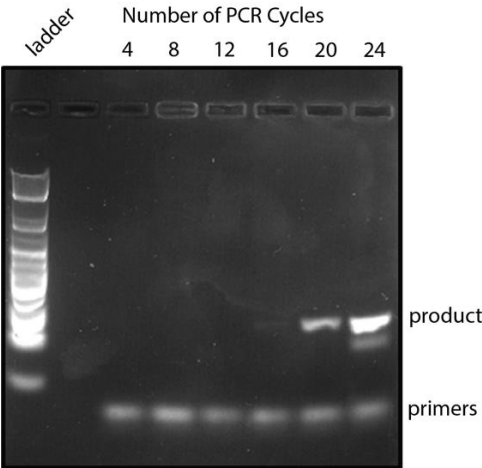

**Figure S1.** PCR Pool validation of ENOX2 binding aptamer. Assay performed with 3% agarose gel with 0.5X TBE; 50bp ladder (New England Biolabs, Ipswich, MA), candidate aptamer pools, and common end primers from the X-Aptamer Selection Kit (AM Biotechnologies, Houston, TX, USA). PCR amplification cycle number was varied to identify minimum cycle number for efficient amplification.

**Table S1.** Image quantification data of electrophoretic mobility shift assay **Figure 1a**.

| [ENOX2],<br>nM | Replicate #1 | Replicate #2 | Replicate #3 |
|----------------|--------------|--------------|--------------|
| 0.3            | 0.31606999   | 0.31276167   | 0.51812476   |
| 1              | 0.66863994   | 0.66730013   | 0.810444     |
| 3              | 0.74604973   | 0.74344432   | 0.87063023   |
| 10             | 0.99202746   | 0.89343431   | 1            |
| 30             | 0.90899324   | 0.91183724   | 0.96341463   |
| 100            | 0.79681615   | 0.80477255   | 0.87804878   |

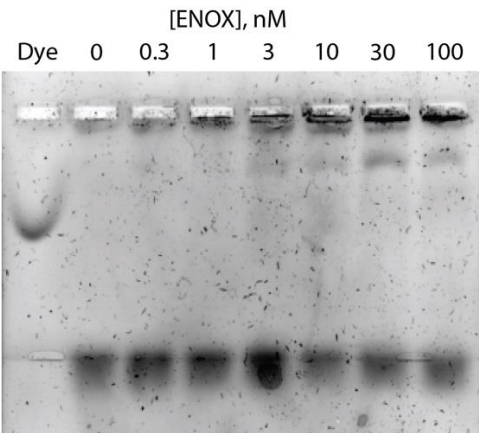

**Figure S2.** Electrophoretic mobility shift assay of ENOX2 binding aptamer. Assay performed using 0.7% agarose gel with 0.5X TBE; fluorescein-labeled aptamer (1 nM); recombinant ENOX2 protein (0 nM to 100 nM).

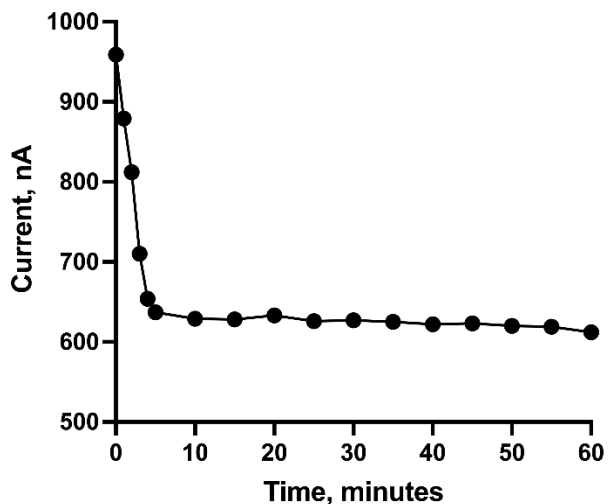

**Figure S3.** The biosensor rapidly (within 5 min) equilibrates to a final signal plateau when incubated with the ENO2 target protein. Changes in peak current over time were measured via SWV following addition of 200 nM ENOX2 protein (at 0 min). A stable response (>90% signal recorded) was demonstrated after 5 min. Based on these data, 10 min was used as the incubation time with ENOX2 protein for our biosensor.

| Frequency, Hz | Blank Response, A | ENOX2 Response, A | Signal Change, % |
|---------------|-------------------|-------------------|------------------|
| 10            | 1.88E-07          | 2.15E-07          | 14%              |
| 33            | 5.15E-07          | 5.69E-07          | 11%              |
| 63            | 7.44E-07          | 6.65E-07          | -11%             |
| 100           | 7.25E-07          | 5.17E-07          | -29%             |
| 166           | 9.30E-07          | 3.49E-07          | <b>-62%</b>      |
| 250           | 1.52E-06          | 1.19E-06          | -22%             |
| 1000          | 2.30E-06          | 2.00E-06          | -13%             |

**Table S2.** Signal gain optimization by different square-wave voltammetry (SWV) frequency. The largest signal change upon ENOX2 target addition was observed with a SWV frequency of 166 Hz, which was consequently selected as the interrogation frequency for the biosensor.

Below is the data used to generate the figures in the article text.

**Table S3.** voltametric data for **Figure 2b**.

| Potential (V) | Buffer    | ENOX (10 nM) | ENOX (100 nM) |
|---------------|-----------|--------------|---------------|
| -0.40017      | 2.81e-007 | 3.06e-007    | 2.91e-007     |
| -0.39945      | 3.02e-007 | 3.02e-007    | 3.35e-007     |
| -0.39893      | 2.95e-007 | 3.34e-007    | 3.08e-007     |
| -0.39854      | 2.75e-007 | 3.05e-007    | 3.3e-007      |
| -0.39786      | 2.67e-007 | 3.13e-007    | 3.25e-007     |
| -0.39744      | 3e-007    | 3.28e-007    | 3.07e-007     |
| -0.3969       | 2.72e-007 | 3.18e-007    | 2.74e-007     |
| -0.39645      | 2.64e-007 | 3.32e-007    | 3.47e-007     |
| -0.3958       | 2.45e-007 | 3.28e-007    | 3.22e-007     |

|          |           |           |           |
|----------|-----------|-----------|-----------|
| -0.39541 | 2.41e-007 | 2.95e-007 | 3.12e-007 |
| -0.39498 | 2.72e-007 | 3.07e-007 | 3.41e-007 |
| -0.39442 | 2.61e-007 | 3.35e-007 | 3.01e-007 |
| -0.39396 | 2.78e-007 | 3.12e-007 | 3.09e-007 |
| -0.39341 | 2.64e-007 | 2.77e-007 | 3.1e-007  |
| -0.39298 | 2.22e-007 | 3.05e-007 | 2.73e-007 |
| -0.39254 | 2.53e-007 | 2.81e-007 | 3.03e-007 |
| -0.39197 | 2.45e-007 | 2.99e-007 | 2.93e-007 |
| -0.39152 | 2.78e-007 | 3.19e-007 | 2.78e-007 |
| -0.39091 | 2.73e-007 | 3.27e-007 | 3.11e-007 |
| -0.39045 | 3.06e-007 | 3.25e-007 | 2.78e-007 |
| -0.38993 | 2.7e-007  | 3.25e-007 | 3.22e-007 |
| -0.38956 | 2.72e-007 | 3.26e-007 | 3e-007    |
| -0.38886 | 2.77e-007 | 2.96e-007 | 3.19e-007 |
| -0.38837 | 2.47e-007 | 2.8e-007  | 2.86e-007 |
| -0.38795 | 2.88e-007 | 2.95e-007 | 2.91e-007 |
| -0.38727 | 2.45e-007 | 2.88e-007 | 2.88e-007 |
| -0.38689 | 2.55e-007 | 2.81e-007 | 3.25e-007 |
| -0.38644 | 2.55e-007 | 2.86e-007 | 3.1e-007  |
| -0.38593 | 2.37e-007 | 3.05e-007 | 2.85e-007 |
| -0.38549 | 2.86e-007 | 3.03e-007 | 2.95e-007 |
| -0.38496 | 2.78e-007 | 2.52e-007 | 2.94e-007 |
| -0.3844  | 2.45e-007 | 3.07e-007 | 2.82e-007 |
| -0.38391 | 2.67e-007 | 2.69e-007 | 2.91e-007 |
| -0.38344 | 2.3e-007  | 2.6e-007  | 2.8e-007  |
| -0.38289 | 2.31e-007 | 3.05e-007 | 2.88e-007 |
| -0.3824  | 2.51e-007 | 3.02e-007 | 2.73e-007 |
| -0.38187 | 2.53e-007 | 2.74e-007 | 2.84e-007 |
| -0.38163 | 2.55e-007 | 2.2e-007  | 3.01e-007 |
| -0.38103 | 2.6e-007  | 3.12e-007 | 2.93e-007 |
| -0.38043 | 2.63e-007 | 2.98e-007 | 3.02e-007 |
| -0.37996 | 2.56e-007 | 2.96e-007 | 3e-007    |
| -0.37935 | 2.49e-007 | 2.79e-007 | 3.17e-007 |
| -0.37887 | 2.55e-007 | 2.64e-007 | 2.63e-007 |
| -0.37832 | 2.29e-007 | 3.07e-007 | 2.3e-007  |
| -0.37779 | 2.71e-007 | 2.62e-007 | 3.28e-007 |
| -0.37763 | 2.61e-007 | 2.67e-007 | 3.07e-007 |
| -0.37691 | 2.52e-007 | 3.14e-007 | 2.92e-007 |
| -0.37657 | 2.56e-007 | 2.99e-007 | 3.05e-007 |
| -0.37594 | 2.62e-007 | 2.64e-007 | 2.91e-007 |
| -0.37539 | 2.43e-007 | 2.78e-007 | 2.94e-007 |
| -0.375   | 2.62e-007 | 2.82e-007 | 2.7e-007  |
| -0.37443 | 2.44e-007 | 3.01e-007 | 2.9e-007  |

|          |           |           |           |
|----------|-----------|-----------|-----------|
| -0.37394 | 2.41e-007 | 2.92e-007 | 2.35e-007 |
| -0.37328 | 2.47e-007 | 3.03e-007 | 2.62e-007 |
| -0.37299 | 2.45e-007 | 2.68e-007 | 2.69e-007 |
| -0.37235 | 2.68e-007 | 2.5e-007  | 2.87e-007 |
| -0.37192 | 2.73e-007 | 2.91e-007 | 2.78e-007 |
| -0.37149 | 2.2e-007  | 3.12e-007 | 2.78e-007 |
| -0.3708  | 2.54e-007 | 2.43e-007 | 3.16e-007 |
| -0.37033 | 2.59e-007 | 2.83e-007 | 2.57e-007 |
| -0.36999 | 2.44e-007 | 2.96e-007 | 2.44e-007 |
| -0.36936 | 2.58e-007 | 2.65e-007 | 2.77e-007 |
| -0.36887 | 2.65e-007 | 2.8e-007  | 3.02e-007 |
| -0.36834 | 2.27e-007 | 2.89e-007 | 2.76e-007 |
| -0.36775 | 2.61e-007 | 2.88e-007 | 2.62e-007 |
| -0.36726 | 2.41e-007 | 2.92e-007 | 2.81e-007 |
| -0.36675 | 2.08e-007 | 2.84e-007 | 2.83e-007 |
| -0.36634 | 2.57e-007 | 2.69e-007 | 2.97e-007 |
| -0.36589 | 2.65e-007 | 2.89e-007 | 2.47e-007 |
| -0.36535 | 2.68e-007 | 2.46e-007 | 3.11e-007 |
| -0.3648  | 2.32e-007 | 3.06e-007 | 2.37e-007 |
| -0.36446 | 2.62e-007 | 2.7e-007  | 2.35e-007 |
| -0.36394 | 2.44e-007 | 2.64e-007 | 3.04e-007 |
| -0.36333 | 2.43e-007 | 2.72e-007 | 2.83e-007 |
| -0.36293 | 2.71e-007 | 2.65e-007 | 2.84e-007 |
| -0.36236 | 2.5e-007  | 2.57e-007 | 2.99e-007 |
| -0.36191 | 2.5e-007  | 2.94e-007 | 2.57e-007 |
| -0.36144 | 2.6e-007  | 3.02e-007 | 2.69e-007 |
| -0.36084 | 2.58e-007 | 2.89e-007 | 2.83e-007 |
| -0.3604  | 2.64e-007 | 2.88e-007 | 2.64e-007 |
| -0.35981 | 2.41e-007 | 2.91e-007 | 2.85e-007 |
| -0.35946 | 2.31e-007 | 2.82e-007 | 2.91e-007 |
| -0.35878 | 2.45e-007 | 2.58e-007 | 2.75e-007 |
| -0.35839 | 2.62e-007 | 2.73e-007 | 3.16e-007 |
| -0.35789 | 2.78e-007 | 2.7e-007  | 2.92e-007 |
| -0.35748 | 2.45e-007 | 2.79e-007 | 2.66e-007 |
| -0.35694 | 2.46e-007 | 2.79e-007 | 3.3e-007  |
| -0.35653 | 2.41e-007 | 2.73e-007 | 2.63e-007 |
| -0.35592 | 2.67e-007 | 2.9e-007  | 2.83e-007 |
| -0.35529 | 2.53e-007 | 2.89e-007 | 2.74e-007 |
| -0.35479 | 2.67e-007 | 2.88e-007 | 2.95e-007 |
| -0.35426 | 2.6e-007  | 2.97e-007 | 2.99e-007 |
| -0.35389 | 2.67e-007 | 2.49e-007 | 2.89e-007 |
| -0.35337 | 2.57e-007 | 2.92e-007 | 2.77e-007 |
| -0.35277 | 2.89e-007 | 2.73e-007 | 3.1e-007  |

|          |           |           |           |
|----------|-----------|-----------|-----------|
| -0.35245 | 2.8e-007  | 2.7e-007  | 2.87e-007 |
| -0.35176 | 2.74e-007 | 2.78e-007 | 2.9e-007  |
| -0.3514  | 2.67e-007 | 2.87e-007 | 2.9e-007  |
| -0.35089 | 2.72e-007 | 2.71e-007 | 2.98e-007 |
| -0.35031 | 2.58e-007 | 2.91e-007 | 2.77e-007 |
| -0.34989 | 2.87e-007 | 2.93e-007 | 2.86e-007 |
| -0.34939 | 2.91e-007 | 2.86e-007 | 3.04e-007 |
| -0.34879 | 2.91e-007 | 2.7e-007  | 2.53e-007 |
| -0.34833 | 2.94e-007 | 3.17e-007 | 2.8e-007  |
| -0.34791 | 2.96e-007 | 2.97e-007 | 2.95e-007 |
| -0.34733 | 2.94e-007 | 2.97e-007 | 3.03e-007 |
| -0.34691 | 2.89e-007 | 3.28e-007 | 2.9e-007  |
| -0.34645 | 2.93e-007 | 2.85e-007 | 2.69e-007 |
| -0.34584 | 3.1e-007  | 3.01e-007 | 2.69e-007 |
| -0.34527 | 3.13e-007 | 2.94e-007 | 3.07e-007 |
| -0.345   | 2.68e-007 | 2.71e-007 | 3.12e-007 |
| -0.34441 | 2.97e-007 | 2.8e-007  | 2.86e-007 |
| -0.34398 | 3.05e-007 | 2.89e-007 | 3e-007    |
| -0.34337 | 3.02e-007 | 2.87e-007 | 3.11e-007 |
| -0.34297 | 2.99e-007 | 3.05e-007 | 2.99e-007 |
| -0.34236 | 2.99e-007 | 3.07e-007 | 3.16e-007 |
| -0.34196 | 3.21e-007 | 2.95e-007 | 3.19e-007 |
| -0.34136 | 2.67e-007 | 3.32e-007 | 3.07e-007 |
| -0.34085 | 3.25e-007 | 3.43e-007 | 3.01e-007 |
| -0.34039 | 3.23e-007 | 2.72e-007 | 3.36e-007 |
| -0.33983 | 3.45e-007 | 2.97e-007 | 2.94e-007 |
| -0.33939 | 3.43e-007 | 3.4e-007  | 3.13e-007 |
| -0.33891 | 3.26e-007 | 3.12e-007 | 3.45e-007 |
| -0.3384  | 3.02e-007 | 3.07e-007 | 2.93e-007 |
| -0.3378  | 3.13e-007 | 3.37e-007 | 3.25e-007 |
| -0.33734 | 3.46e-007 | 3.22e-007 | 2.79e-007 |
| -0.33679 | 3.09e-007 | 3.27e-007 | 3.38e-007 |
| -0.33631 | 3.23e-007 | 2.94e-007 | 2.99e-007 |
| -0.33583 | 3.09e-007 | 3.52e-007 | 3.02e-007 |
| -0.33531 | 3.3e-007  | 3.21e-007 | 2.94e-007 |
| -0.33477 | 3.6e-007  | 3.59e-007 | 3.01e-007 |
| -0.33439 | 3.59e-007 | 3.58e-007 | 3.68e-007 |
| -0.33389 | 3.57e-007 | 2.86e-007 | 3.53e-007 |
| -0.33335 | 3.57e-007 | 3.44e-007 | 3.46e-007 |
| -0.33282 | 3.56e-007 | 3.4e-007  | 3.03e-007 |
| -0.33245 | 4e-007    | 3.75e-007 | 3.31e-007 |
| -0.33181 | 3.59e-007 | 3.51e-007 | 3.15e-007 |
| -0.33132 | 3.91e-007 | 3.63e-007 | 3.37e-007 |

|          |           |           |           |
|----------|-----------|-----------|-----------|
| -0.33087 | 3.33e-007 | 3.7e-007  | 3.29e-007 |
| -0.33048 | 3.74e-007 | 3.71e-007 | 3.6e-007  |
| -0.32983 | 3.79e-007 | 3.66e-007 | 3.25e-007 |
| -0.32942 | 4.16e-007 | 3.94e-007 | 3.74e-007 |
| -0.32885 | 3.78e-007 | 4e-007    | 3.63e-007 |
| -0.32842 | 3.99e-007 | 3.38e-007 | 3.71e-007 |
| -0.32795 | 3.92e-007 | 3.95e-007 | 3.76e-007 |
| -0.32738 | 3.9e-007  | 3.85e-007 | 3.29e-007 |
| -0.32679 | 3.94e-007 | 4.12e-007 | 3.7e-007  |
| -0.32632 | 4.22e-007 | 3.82e-007 | 3.86e-007 |
| -0.32592 | 4.47e-007 | 3.82e-007 | 3.69e-007 |
| -0.32535 | 4.34e-007 | 3.48e-007 | 3.78e-007 |
| -0.32482 | 4.09e-007 | 4.31e-007 | 3.7e-007  |
| -0.32431 | 4.52e-007 | 4.15e-007 | 3.7e-007  |
| -0.32382 | 4e-007    | 4.05e-007 | 3.7e-007  |
| -0.32331 | 4.27e-007 | 4.04e-007 | 3.91e-007 |
| -0.32279 | 4.58e-007 | 4.1e-007  | 4.03e-007 |
| -0.32247 | 4.44e-007 | 4.6e-007  | 4.09e-007 |
| -0.32182 | 4.86e-007 | 4.22e-007 | 3.97e-007 |
| -0.32132 | 4.77e-007 | 4.52e-007 | 4.02e-007 |
| -0.32065 | 4.72e-007 | 4.3e-007  | 4.22e-007 |
| -0.32029 | 4.6e-007  | 4.13e-007 | 4.1e-007  |
| -0.31985 | 4.79e-007 | 4.05e-007 | 4.27e-007 |
| -0.31934 | 4.73e-007 | 4.3e-007  | 3.81e-007 |
| -0.31874 | 5.03e-007 | 4.42e-007 | 4.19e-007 |
| -0.31826 | 5.33e-007 | 4.38e-007 | 4.21e-007 |
| -0.31778 | 5.15e-007 | 4.59e-007 | 3.94e-007 |
| -0.3173  | 5.32e-007 | 4.73e-007 | 4.21e-007 |
| -0.31681 | 5.44e-007 | 4.95e-007 | 4.42e-007 |
| -0.31633 | 5.7e-007  | 4.65e-007 | 4.25e-007 |
| -0.31578 | 5.34e-007 | 4.54e-007 | 4.29e-007 |
| -0.31519 | 5.45e-007 | 5.25e-007 | 4.36e-007 |
| -0.31482 | 5.59e-007 | 4.85e-007 | 4.53e-007 |
| -0.31438 | 5.22e-007 | 4.74e-007 | 4.65e-007 |
| -0.31369 | 5.21e-007 | 4.5e-007  | 4.93e-007 |
| -0.31325 | 5.4e-007  | 4.93e-007 | 4.66e-007 |
| -0.31279 | 5.92e-007 | 4.81e-007 | 4.85e-007 |
| -0.31239 | 5.66e-007 | 5.22e-007 | 4.76e-007 |
| -0.31173 | 6.07e-007 | 5.38e-007 | 4.85e-007 |
| -0.31131 | 5.9e-007  | 4.69e-007 | 4.83e-007 |
| -0.31087 | 5.77e-007 | 4.97e-007 | 4.92e-007 |
| -0.31025 | 6.36e-007 | 5.31e-007 | 5.09e-007 |
| -0.30982 | 6.1e-007  | 5.43e-007 | 5.34e-007 |

|          |           |           |           |
|----------|-----------|-----------|-----------|
| -0.30921 | 6.07e-007 | 5.31e-007 | 5.14e-007 |
| -0.3087  | 6.29e-007 | 5.49e-007 | 4.96e-007 |
| -0.30834 | 6.27e-007 | 5.34e-007 | 5.51e-007 |
| -0.3077  | 6.31e-007 | 5.54e-007 | 5.25e-007 |
| -0.30716 | 6.39e-007 | 5.75e-007 | 5.18e-007 |
| -0.30679 | 6.75e-007 | 5.62e-007 | 5.7e-007  |
| -0.30631 | 6.68e-007 | 5.72e-007 | 5.31e-007 |
| -0.30584 | 6.95e-007 | 5.97e-007 | 5.75e-007 |
| -0.30523 | 6.76e-007 | 6.02e-007 | 5.51e-007 |
| -0.30466 | 6.84e-007 | 6.16e-007 | 5.63e-007 |
| -0.30427 | 7.04e-007 | 5.98e-007 | 5.47e-007 |
| -0.30371 | 7.04e-007 | 5.86e-007 | 5.87e-007 |
| -0.30319 | 7.23e-007 | 6.38e-007 | 5.65e-007 |
| -0.30272 | 7.27e-007 | 6.36e-007 | 5.59e-007 |
| -0.30226 | 7.3e-007  | 6.16e-007 | 6.08e-007 |
| -0.30162 | 7.37e-007 | 6.29e-007 | 5.93e-007 |
| -0.30144 | 7.28e-007 | 6.49e-007 | 5.97e-007 |
| -0.30074 | 7.42e-007 | 6.59e-007 | 6.09e-007 |
| -0.30026 | 7.45e-007 | 6.75e-007 | 6.13e-007 |
| -0.29982 | 7.58e-007 | 6.6e-007  | 6.28e-007 |
| -0.2993  | 7.66e-007 | 6.66e-007 | 5.91e-007 |
| -0.29886 | 7.73e-007 | 6.79e-007 | 6.52e-007 |
| -0.2983  | 7.98e-007 | 6.87e-007 | 6.41e-007 |
| -0.29781 | 8.12e-007 | 6.95e-007 | 6.55e-007 |
| -0.29732 | 7.84e-007 | 7.25e-007 | 6.75e-007 |
| -0.29672 | 8.32e-007 | 6.87e-007 | 6.65e-007 |
| -0.29628 | 8.16e-007 | 7.01e-007 | 6.48e-007 |
| -0.29581 | 8.26e-007 | 7.08e-007 | 6.5e-007  |
| -0.29529 | 8.26e-007 | 6.72e-007 | 6.67e-007 |
| -0.29495 | 8.2e-007  | 7.06e-007 | 6.39e-007 |
| -0.29434 | 8.27e-007 | 6.77e-007 | 7.18e-007 |
| -0.29384 | 8.4e-007  | 7.74e-007 | 6.51e-007 |
| -0.29335 | 8.51e-007 | 7.29e-007 | 6.79e-007 |
| -0.29272 | 8.48e-007 | 7.27e-007 | 6.95e-007 |
| -0.29229 | 8.57e-007 | 7.18e-007 | 6.96e-007 |
| -0.29178 | 8.95e-007 | 6.89e-007 | 6.97e-007 |
| -0.29126 | 8.64e-007 | 7.48e-007 | 6.96e-007 |
| -0.29076 | 8.64e-007 | 7.51e-007 | 7.27e-007 |
| -0.29033 | 8.97e-007 | 7.28e-007 | 7.12e-007 |
| -0.28971 | 8.94e-007 | 7.58e-007 | 7.16e-007 |
| -0.28928 | 9.11e-007 | 7.8e-007  | 7.19e-007 |
| -0.28885 | 9.16e-007 | 7.46e-007 | 6.9e-007  |
| -0.28831 | 9e-007    | 7.07e-007 | 6.91e-007 |

|          |           |           |           |
|----------|-----------|-----------|-----------|
| -0.28777 | 9.25e-007 | 7.91e-007 | 7.24e-007 |
| -0.28721 | 9e-007    | 7.9e-007  | 7.4e-007  |
| -0.28671 | 8.85e-007 | 7.83e-007 | 7.67e-007 |
| -0.28619 | 9.19e-007 | 7.6e-007  | 7.39e-007 |
| -0.28567 | 9.05e-007 | 7.89e-007 | 7.42e-007 |
| -0.28526 | 9.37e-007 | 8.11e-007 | 7.67e-007 |
| -0.28478 | 9.32e-007 | 7.93e-007 | 7.68e-007 |
| -0.28424 | 9.27e-007 | 7.75e-007 | 7.36e-007 |
| -0.28376 | 9.78e-007 | 7.87e-007 | 7.77e-007 |
| -0.28326 | 9.17e-007 | 8.02e-007 | 7.71e-007 |
| -0.28286 | 9.35e-007 | 8.17e-007 | 7.7e-007  |
| -0.28226 | 9.03e-007 | 8.12e-007 | 7.98e-007 |
| -0.28182 | 9.6e-007  | 7.99e-007 | 7.79e-007 |
| -0.2812  | 9.59e-007 | 8.36e-007 | 7.55e-007 |
| -0.28067 | 9.3e-007  | 7.93e-007 | 7.68e-007 |
| -0.2803  | 9.68e-007 | 8.28e-007 | 7.96e-007 |
| -0.2797  | 9.13e-007 | 8e-007    | 7.77e-007 |
| -0.2792  | 9.33e-007 | 8.37e-007 | 7.71e-007 |
| -0.27873 | 9.29e-007 | 8.28e-007 | 8.01e-007 |
| -0.27833 | 9.6e-007  | 8.21e-007 | 7.94e-007 |
| -0.27761 | 9.29e-007 | 8.01e-007 | 7.91e-007 |
| -0.27722 | 9.4e-007  | 8.1e-007  | 7.9e-007  |
| -0.27676 | 9.14e-007 | 8.48e-007 | 8.04e-007 |
| -0.27626 | 9.57e-007 | 8.3e-007  | 7.55e-007 |
| -0.2758  | 9.67e-007 | 8.55e-007 | 8e-007    |
| -0.27533 | 9.45e-007 | 8.02e-007 | 7.71e-007 |
| -0.27469 | 9.35e-007 | 7.89e-007 | 7.95e-007 |
| -0.2743  | 9.72e-007 | 7.89e-007 | 7.92e-007 |
| -0.27374 | 9.49e-007 | 8.24e-007 | 7.92e-007 |
| -0.27317 | 9.79e-007 | 8.21e-007 | 8.01e-007 |
| -0.27281 | 9.41e-007 | 8.21e-007 | 7.85e-007 |
| -0.2722  | 9.05e-007 | 8.21e-007 | 7.83e-007 |
| -0.27169 | 9.3e-007  | 8.28e-007 | 7.8e-007  |
| -0.27115 | 9.19e-007 | 8.22e-007 | 8e-007    |
| -0.27069 | 9.43e-007 | 8.41e-007 | 7.74e-007 |
| -0.27029 | 9.03e-007 | 8.27e-007 | 7.56e-007 |
| -0.2696  | 9.1e-007  | 8.25e-007 | 7.59e-007 |
| -0.26907 | 9.21e-007 | 7.93e-007 | 8.07e-007 |
| -0.26871 | 9.17e-007 | 8.27e-007 | 7.65e-007 |
| -0.2683  | 9e-007    | 7.93e-007 | 7.34e-007 |
| -0.26772 | 8.84e-007 | 8.01e-007 | 7.32e-007 |
| -0.26728 | 9.14e-007 | 8.07e-007 | 7.44e-007 |
| -0.26685 | 9.33e-007 | 7.96e-007 | 7.5e-007  |



|          |           |           |           |
|----------|-----------|-----------|-----------|
| -0.26632 | 9.09e-007 | 7.55e-007 | 7.64e-007 |
| -0.26565 | 8.84e-007 | 8e-007    | 7.55e-007 |
| -0.26529 | 9.2e-007  | 7.66e-007 | 7.23e-007 |
| -0.26481 | 8.9e-007  | 8.03e-007 | 7.39e-007 |
| -0.26433 | 8.75e-007 | 7.56e-007 | 7.48e-007 |
| -0.26369 | 8.97e-007 | 8.06e-007 | 7.24e-007 |
| -0.26329 | 8.48e-007 | 7.7e-007  | 7.35e-007 |
| -0.26271 | 8.23e-007 | 7.47e-007 | 7.17e-007 |
| -0.2622  | 8.63e-007 | 7.47e-007 | 7.16e-007 |
| -0.26166 | 8.56e-007 | 7.51e-007 | 7.01e-007 |
| -0.2613  | 8.62e-007 | 7.42e-007 | 7.33e-007 |
| -0.26077 | 8.11e-007 | 7.58e-007 | 7.15e-007 |
| -0.26022 | 8.2e-007  | 7.48e-007 | 7.26e-007 |
| -0.25955 | 8.26e-007 | 7.45e-007 | 7.25e-007 |
| -0.25918 | 8.3e-007  | 7.48e-007 | 6.89e-007 |
| -0.25884 | 8.01e-007 | 7.16e-007 | 6.84e-007 |
| -0.25828 | 7.71e-007 | 7.36e-007 | 6.67e-007 |
| -0.25757 | 7.92e-007 | 7.05e-007 | 6.75e-007 |
| -0.25717 | 8.06e-007 | 6.93e-007 | 6.77e-007 |
| -0.25677 | 7.71e-007 | 7.09e-007 | 6.84e-007 |
| -0.25607 | 7.81e-007 | 6.92e-007 | 6.82e-007 |
| -0.2556  | 8.04e-007 | 7.09e-007 | 6.96e-007 |
| -0.25524 | 7.46e-007 | 6.72e-007 | 6.4e-007  |
| -0.25486 | 7.31e-007 | 6.75e-007 | 6.73e-007 |
| -0.2543  | 7.2e-007  | 6.58e-007 | 6.64e-007 |
| -0.25359 | 7.23e-007 | 6.47e-007 | 6.54e-007 |
| -0.25313 | 7.41e-007 | 6.79e-007 | 6.49e-007 |
| -0.25268 | 7.37e-007 | 6.46e-007 | 6.13e-007 |
| -0.25229 | 7.03e-007 | 6.37e-007 | 6.19e-007 |
| -0.25175 | 6.92e-007 | 6.59e-007 | 6.09e-007 |
| -0.2512  | 6.59e-007 | 6.45e-007 | 6.45e-007 |
| -0.25076 | 6.94e-007 | 6.51e-007 | 6.21e-007 |
| -0.25016 | 6.69e-007 | 6.36e-007 | 6.38e-007 |
| -0.24968 | 6.94e-007 | 6.42e-007 | 5.69e-007 |
| -0.2491  | 6.52e-007 | 6.25e-007 | 6e-007    |
| -0.24876 | 6.75e-007 | 6.14e-007 | 6.09e-007 |
| -0.24828 | 6.33e-007 | 6.19e-007 | 5.64e-007 |
| -0.24764 | 6.29e-007 | 6.29e-007 | 5.94e-007 |
| -0.24725 | 6.42e-007 | 6.22e-007 | 5.78e-007 |
| -0.24688 | 6.76e-007 | 5.69e-007 | 5.73e-007 |
| -0.24624 | 6.31e-007 | 5.93e-007 | 5.57e-007 |
| -0.24576 | 6.32e-007 | 5.8e-007  | 5.57e-007 |
| -0.24507 | 5.9e-007  | 5.84e-007 | 5.48e-007 |

|          |           |           |           |
|----------|-----------|-----------|-----------|
| -0.24474 | 6.08e-007 | 5.66e-007 | 5.57e-007 |
| -0.24427 | 6.15e-007 | 5.55e-007 | 5.52e-007 |
| -0.24361 | 5.96e-007 | 5.61e-007 | 5.48e-007 |
| -0.24334 | 5.71e-007 | 5.48e-007 | 5.38e-007 |
| -0.24269 | 5.7e-007  | 5.35e-007 | 5.28e-007 |
| -0.24214 | 5.87e-007 | 5.34e-007 | 5.32e-007 |
| -0.24178 | 5.59e-007 | 5.41e-007 | 4.72e-007 |
| -0.24125 | 5.59e-007 | 5.41e-007 | 5.28e-007 |
| -0.24074 | 5.71e-007 | 5.44e-007 | 5.07e-007 |
| -0.24032 | 5.64e-007 | 4.94e-007 | 4.62e-007 |
| -0.23975 | 5.09e-007 | 5.06e-007 | 4.67e-007 |
| -0.23922 | 5.21e-007 | 5.29e-007 | 4.67e-007 |
| -0.23872 | 5.03e-007 | 4.9e-007  | 4.64e-007 |
| -0.2383  | 5.68e-007 | 4.96e-007 | 4.62e-007 |
| -0.23781 | 4.89e-007 | 4.92e-007 | 4.29e-007 |
| -0.23731 | 5.07e-007 | 4.26e-007 | 4.61e-007 |
| -0.23676 | 4.73e-007 | 4.35e-007 | 4.69e-007 |
| -0.23625 | 4.87e-007 | 4.94e-007 | 4.59e-007 |
| -0.23582 | 4.89e-007 | 4.9e-007  | 4.58e-007 |
| -0.23526 | 4.48e-007 | 4.39e-007 | 4.54e-007 |
| -0.23477 | 4.94e-007 | 4.64e-007 | 4.57e-007 |
| -0.23423 | 4.97e-007 | 4.36e-007 | 4.6e-007  |
| -0.23378 | 4.37e-007 | 4.56e-007 | 4.21e-007 |
| -0.23319 | 4.31e-007 | 4.47e-007 | 3.93e-007 |
| -0.23282 | 4.56e-007 | 4.26e-007 | 3.93e-007 |
| -0.23241 | 4.29e-007 | 4.27e-007 | 4.12e-007 |
| -0.23187 | 4.12e-007 | 4.42e-007 | 4.28e-007 |
| -0.23131 | 4.2e-007  | 4.17e-007 | 3.84e-007 |
| -0.23078 | 4.22e-007 | 4.17e-007 | 4.25e-007 |
| -0.23034 | 3.96e-007 | 4e-007    | 3.8e-007  |
| -0.2298  | 3.94e-007 | 4.07e-007 | 3.74e-007 |
| -0.22944 | 3.82e-007 | 4.15e-007 | 3.82e-007 |
| -0.22874 | 4.01e-007 | 3.93e-007 | 3.85e-007 |
| -0.22824 | 4.01e-007 | 3.83e-007 | 3.66e-007 |
| -0.22784 | 3.81e-007 | 3.98e-007 | 3.49e-007 |
| -0.22743 | 4.09e-007 | 3.99e-007 | 3.82e-007 |
| -0.2269  | 4.3e-007  | 3.99e-007 | 3.74e-007 |
| -0.22635 | 3.7e-007  | 3.63e-007 | 3.48e-007 |
| -0.22598 | 3.6e-007  | 3.72e-007 | 3.48e-007 |
| -0.22535 | 3.36e-007 | 3.72e-007 | 3.75e-007 |
| -0.22489 | 3.68e-007 | 3.99e-007 | 3.57e-007 |
| -0.2243  | 3.58e-007 | 3.74e-007 | 3.42e-007 |
| -0.2239  | 3.61e-007 | 3.39e-007 | 3.35e-007 |

|          |           |           |           |
|----------|-----------|-----------|-----------|
| -0.22329 | 3.63e-007 | 3.28e-007 | 3.3e-007  |
| -0.22295 | 3.36e-007 | 3.41e-007 | 2.79e-007 |
| -0.22241 | 3.64e-007 | 3.19e-007 | 3.22e-007 |
| -0.2218  | 3.42e-007 | 3.34e-007 | 3.16e-007 |
| -0.22134 | 3.42e-007 | 3.2e-007  | 3.24e-007 |
| -0.22075 | 3.28e-007 | 3.05e-007 | 2.95e-007 |
| -0.2204  | 3.28e-007 | 3.4e-007  | 3.01e-007 |
| -0.21992 | 2.99e-007 | 2.9e-007  | 2.89e-007 |
| -0.21933 | 3.16e-007 | 3.42e-007 | 3.23e-007 |
| -0.21888 | 2.83e-007 | 2.87e-007 | 3.14e-007 |
| -0.21844 | 3.04e-007 | 3.32e-007 | 2.99e-007 |
| -0.21797 | 2.83e-007 | 3.24e-007 | 2.91e-007 |
| -0.21747 | 2.96e-007 | 2.68e-007 | 2.63e-007 |
| -0.21688 | 2.92e-007 | 3.04e-007 | 2.72e-007 |
| -0.21633 | 3.17e-007 | 2.92e-007 | 2.77e-007 |
| -0.21588 | 2.74e-007 | 3.16e-007 | 2.75e-007 |
| -0.21556 | 2.95e-007 | 3.12e-007 | 2.65e-007 |
| -0.21496 | 2.71e-007 | 3.1e-007  | 2.42e-007 |
| -0.21445 | 2.73e-007 | 2.65e-007 | 2.58e-007 |
| -0.21386 | 2.77e-007 | 2.64e-007 | 3.03e-007 |
| -0.21338 | 2.38e-007 | 2.67e-007 | 2.8e-007  |
| -0.21296 | 2.77e-007 | 2.79e-007 | 2.74e-007 |
| -0.21244 | 2.72e-007 | 2.52e-007 | 2.63e-007 |
| -0.2119  | 2.74e-007 | 3.1e-007  | 2.88e-007 |
| -0.21153 | 2.6e-007  | 2.78e-007 | 2.75e-007 |
| -0.21097 | 2.82e-007 | 2.75e-007 | 2.91e-007 |
| -0.21039 | 2.17e-007 | 2.61e-007 | 2.77e-007 |
| -0.21009 | 2.43e-007 | 2.61e-007 | 2.6e-007  |
| -0.2095  | 2.69e-007 | 2.68e-007 | 2.26e-007 |
| -0.20897 | 2.51e-007 | 2.62e-007 | 2.54e-007 |
| -0.20844 | 2.54e-007 | 2.72e-007 | 2.39e-007 |
| -0.20804 | 2.56e-007 | 2.77e-007 | 2.77e-007 |
| -0.20762 | 2.38e-007 | 2.7e-007  | 2.63e-007 |
| -0.20699 | 2.36e-007 | 2.78e-007 | 2.77e-007 |
| -0.20652 | 2.1e-007  | 2.51e-007 | 2.54e-007 |
| -0.20606 | 2.06e-007 | 2.73e-007 | 2.48e-007 |
| -0.20548 | 2.45e-007 | 2.78e-007 | 2.57e-007 |
| -0.20496 | 2.33e-007 | 2.41e-007 | 2.47e-007 |
| -0.20444 | 2.29e-007 | 2.84e-007 | 2.59e-007 |
| -0.204   | 1.91e-007 | 2.54e-007 | 2.09e-007 |
| -0.20334 | 2.33e-007 | 2.59e-007 | 2.08e-007 |
| -0.20286 | 2.12e-007 | 2.51e-007 | 2.41e-007 |
| -0.2025  | 2.05e-007 | 2.52e-007 | 1.95e-007 |

|          |           |           |           |
|----------|-----------|-----------|-----------|
| -0.20195 | 2.34e-007 | 2.59e-007 | 2.29e-007 |
| -0.20139 | 2.15e-007 | 2.37e-007 | 2.36e-007 |
| -0.20084 | 2.35e-007 | 2.19e-007 | 2.51e-007 |
| -0.20042 | 2.35e-007 | 2.05e-007 | 2.11e-007 |
| -0.19988 | 1.93e-007 | 2.26e-007 | 2.26e-007 |
| -0.19935 | 1.89e-007 | 2.51e-007 | 2.11e-007 |
| -0.19897 | 2.03e-007 | 2.47e-007 | 2.27e-007 |
| -0.19844 | 2.18e-007 | 2.48e-007 | 2.25e-007 |
| -0.19793 | 1.88e-007 | 2.3e-007  | 2.32e-007 |
| -0.19739 | 2e-007    | 2.08e-007 | 1.78e-007 |
| -0.19693 | 1.97e-007 | 2.15e-007 | 2.16e-007 |
| -0.19661 | 2.24e-007 | 2.34e-007 | 2.3e-007  |
| -0.19593 | 1.94e-007 | 2.43e-007 | 2.28e-007 |
| -0.19542 | 1.92e-007 | 2.15e-007 | 2.35e-007 |
| -0.19478 | 1.84e-007 | 1.77e-007 | 1.94e-007 |
| -0.19438 | 1.85e-007 | 2.3e-007  | 2e-007    |
| -0.19387 | 1.66e-007 | 1.81e-007 | 2.31e-007 |
| -0.1934  | 2.07e-007 | 2.42e-007 | 1.75e-007 |
| -0.19287 | 1.76e-007 | 2.08e-007 | 2.23e-007 |
| -0.19243 | 2.12e-007 | 2.31e-007 | 2.18e-007 |
| -0.192   | 1.84e-007 | 2e-007    | 1.86e-007 |
| -0.19144 | 1.88e-007 | 2.33e-007 | 2.29e-007 |
| -0.19101 | 1.69e-007 | 2.29e-007 | 2e-007    |
| -0.19046 | 1.94e-007 | 1.99e-007 | 2.24e-007 |
| -0.18997 | 1.95e-007 | 2.21e-007 | 1.91e-007 |
| -0.18944 | 2.03e-007 | 2.02e-007 | 2.3e-007  |
| -0.18898 | 1.61e-007 | 2.03e-007 | 2.02e-007 |
| -0.18843 | 1.95e-007 | 2.17e-007 | 2.28e-007 |
| -0.18796 | 1.67e-007 | 2.27e-007 | 2.26e-007 |
| -0.18747 | 1.58e-007 | 2.32e-007 | 2.31e-007 |
| -0.1868  | 1.58e-007 | 1.89e-007 | 2.3e-007  |
| -0.18661 | 2.23e-007 | 1.76e-007 | 1.88e-007 |
| -0.18607 | 2.07e-007 | 2.13e-007 | 2.08e-007 |
| -0.18553 | 1.67e-007 | 2.03e-007 | 2.2e-007  |
| -0.18493 | 2.03e-007 | 2.08e-007 | 1.96e-007 |
| -0.18447 | 1.64e-007 | 2.09e-007 | 1.86e-007 |
| -0.18412 | 2.02e-007 | 1.75e-007 | 2.04e-007 |
| -0.18346 | 1.73e-007 | 2.33e-007 | 1.88e-007 |
| -0.18304 | 1.69e-007 | 2.06e-007 | 2.19e-007 |
| -0.18266 | 2.2e-007  | 2.06e-007 | 2.23e-007 |
| -0.18201 | 1.72e-007 | 1.94e-007 | 2.15e-007 |
| -0.18139 | 1.55e-007 | 1.86e-007 | 1.95e-007 |
| -0.18101 | 2.02e-007 | 2.06e-007 | 2.2e-007  |

|          |           |           |           |
|----------|-----------|-----------|-----------|
| -0.18046 | 1.71e-007 | 2.09e-007 | 2.02e-007 |
| -0.18006 | 1.54e-007 | 2.13e-007 | 1.91e-007 |
| -0.17949 | 1.8e-007  | 1.82e-007 | 2.09e-007 |
| -0.179   | 1.81e-007 | 2.27e-007 | 1.86e-007 |
| -0.17847 | 1.75e-007 | 1.63e-007 | 2.21e-007 |
| -0.17803 | 1.61e-007 | 1.73e-007 | 2.07e-007 |
| -0.17769 | 1.62e-007 | 2.14e-007 | 2.07e-007 |
| -0.17697 | 2.14e-007 | 2.22e-007 | 1.82e-007 |
| -0.17646 | 1.51e-007 | 1.85e-007 | 1.99e-007 |
| -0.17612 | 1.64e-007 | 2.21e-007 | 2.08e-007 |
| -0.17536 | 1.95e-007 | 1.9e-007  | 2.13e-007 |
| -0.17507 | 2.32e-007 | 2.14e-007 | 2.09e-007 |
| -0.17455 | 2.32e-007 | 1.85e-007 | 2.34e-007 |
| -0.17413 | 1.37e-007 | 1.95e-007 | 1.88e-007 |
| -0.1736  | 1.57e-007 | 1.93e-007 | 1.69e-007 |
| -0.17306 | 1.96e-007 | 1.91e-007 | 2.2e-007  |
| -0.17239 | 1.36e-007 | 1.95e-007 | 1.88e-007 |
| -0.17212 | 1.67e-007 | 1.88e-007 | 2.07e-007 |
| -0.17153 | 1.68e-007 | 2.04e-007 | 2.19e-007 |
| -0.171   | 1.61e-007 | 1.84e-007 | 2.14e-007 |
| -0.17054 | 1.75e-007 | 2.05e-007 | 2.02e-007 |
| -0.17017 | 1.75e-007 | 2.06e-007 | 2.14e-007 |
| -0.16954 | 1.74e-007 | 1.9e-007  | 2.07e-007 |
| -0.16898 | 1.84e-007 | 2.3e-007  | 2.07e-007 |
| -0.16861 | 1.66e-007 | 1.83e-007 | 2e-007    |
| -0.16805 | 1.67e-007 | 1.85e-007 | 1.63e-007 |
| -0.16755 | 1.85e-007 | 1.84e-007 | 2.36e-007 |
| -0.16705 | 1.63e-007 | 2.11e-007 | 2.36e-007 |
| -0.16659 | 1.51e-007 | 1.95e-007 | 2.34e-007 |
| -0.16605 | 1.85e-007 | 2.13e-007 | 2.14e-007 |
| -0.16564 | 1.54e-007 | 2.02e-007 | 2.27e-007 |
| -0.16511 | 1.69e-007 | 2.28e-007 | 2.03e-007 |
| -0.16458 | 1.83e-007 | 1.96e-007 | 2.06e-007 |
| -0.16411 | 1.61e-007 | 1.67e-007 | 2.28e-007 |
| -0.16366 | 1.64e-007 | 2.21e-007 | 1.95e-007 |
| -0.16308 | 1.56e-007 | 1.75e-007 | 2.45e-007 |
| -0.16262 | 1.73e-007 | 1.76e-007 | 2.49e-007 |
| -0.16224 | 1.88e-007 | 2.01e-007 | 2.02e-007 |
| -0.16167 | 1.44e-007 | 2.22e-007 | 2.08e-007 |
| -0.16112 | 1.87e-007 | 1.96e-007 | 2.07e-007 |
| -0.16072 | 1.79e-007 | 2.05e-007 | 2.16e-007 |
| -0.16017 | 1.92e-007 | 1.78e-007 | 2.4e-007  |
| -0.15983 | 1.56e-007 | 2.24e-007 | 2.12e-007 |

|          |           |           |           |
|----------|-----------|-----------|-----------|
| -0.15922 | 1.33e-007 | 2.11e-007 | 2.16e-007 |
| -0.15878 | 1.95e-007 | 2.16e-007 | 2.4e-007  |
| -0.15824 | 1.72e-007 | 2.01e-007 | 2.22e-007 |
| -0.15766 | 1.77e-007 | 2.09e-007 | 1.9e-007  |
| -0.15717 | 1.64e-007 | 1.92e-007 | 2.26e-007 |
| -0.15655 | 1.7e-007  | 2.24e-007 | 1.92e-007 |
| -0.15612 | 1.66e-007 | 2.32e-007 | 1.94e-007 |
| -0.1557  | 1.55e-007 | 2e-007    | 1.98e-007 |
| -0.15505 | 1.68e-007 | 2.04e-007 | 2.05e-007 |
| -0.15448 | 1.4e-007  | 2.17e-007 | 2.15e-007 |
| -0.15422 | 2.03e-007 | 1.77e-007 | 2.12e-007 |
| -0.15372 | 1.53e-007 | 1.59e-007 | 2.13e-007 |
| -0.15313 | 1.66e-007 | 2.16e-007 | 2.35e-007 |
| -0.15266 | 1.7e-007  | 1.94e-007 | 2.29e-007 |
| -0.15208 | 1.76e-007 | 1.99e-007 | 2.43e-007 |
| -0.15171 | 1.41e-007 | 2.09e-007 | 1.79e-007 |
| -0.15107 | 1.68e-007 | 2.08e-007 | 1.82e-007 |
| -0.15069 | 1.76e-007 | 2e-007    | 2.19e-007 |
| -0.15023 | 1.82e-007 | 2.2e-007  | 2.4e-007  |
| -0.14966 | 1.56e-007 | 1.82e-007 | 2.23e-007 |
| -0.14916 | 1.63e-007 | 1.87e-007 | 2.04e-007 |
| -0.14866 | 1.51e-007 | 2.04e-007 | 1.95e-007 |
| -0.14837 | 1.58e-007 | 2.37e-007 | 2.29e-007 |
| -0.14758 | 1.81e-007 | 2.15e-007 | 2.2e-007  |
| -0.14718 | 1.66e-007 | 2.12e-007 | 2.11e-007 |
| -0.14646 | 1.54e-007 | 1.81e-007 | 2.11e-007 |
| -0.14625 | 1.52e-007 | 2.05e-007 | 1.74e-007 |
| -0.14561 | 1.6e-007  | 2.19e-007 | 2.34e-007 |
| -0.14521 | 1.37e-007 | 2.15e-007 | 1.93e-007 |
| -0.14471 | 1.52e-007 | 2.07e-007 | 2.21e-007 |
| -0.14416 | 1.64e-007 | 2.04e-007 | 2.11e-007 |
| -0.14376 | 1.57e-007 | 1.8e-007  | 2.13e-007 |
| -0.14328 | 1.74e-007 | 2.04e-007 | 2.49e-007 |
| -0.14274 | 1.62e-007 | 1.91e-007 | 2.19e-007 |
| -0.14227 | 1.81e-007 | 1.99e-007 | 2.12e-007 |
| -0.14169 | 1.66e-007 | 1.96e-007 | 1.7e-007  |
| -0.14114 | 1.58e-007 | 1.9e-007  | 1.9e-007  |
| -0.14081 | 1.82e-007 | 2.18e-007 | 2.39e-007 |
| -0.14026 | 1.74e-007 | 1.82e-007 | 1.87e-007 |
| -0.13964 | 1.82e-007 | 2.33e-007 | 1.86e-007 |
| -0.13915 | 1.81e-007 | 2.34e-007 | 2.38e-007 |
| -0.13865 | 1.73e-007 | 1.84e-007 | 2.04e-007 |
| -0.13821 | 1.34e-007 | 2.17e-007 | 1.97e-007 |

|          |           |           |           |
|----------|-----------|-----------|-----------|
| -0.13763 | 1.71e-007 | 2.15e-007 | 2.13e-007 |
| -0.13722 | 1.71e-007 | 2.03e-007 | 2.09e-007 |
| -0.13661 | 1.53e-007 | 1.69e-007 | 2.21e-007 |
| -0.13622 | 1.69e-007 | 2.02e-007 | 2.12e-007 |
| -0.13582 | 1.47e-007 | 2.02e-007 | 2.03e-007 |
| -0.13513 | 1.61e-007 | 2.32e-007 | 2.2e-007  |
| -0.13466 | 1.47e-007 | 2.13e-007 | 2.01e-007 |
| -0.13427 | 1.77e-007 | 1.75e-007 | 1.86e-007 |
| -0.13384 | 1.6e-007  | 2.11e-007 | 1.98e-007 |
| -0.13328 | 1.53e-007 | 2.04e-007 | 2.05e-007 |
| -0.13272 | 1.84e-007 | 1.8e-007  | 2.04e-007 |
| -0.13218 | 1.81e-007 | 2.09e-007 | 1.81e-007 |
| -0.13162 | 1.67e-007 | 1.92e-007 | 1.81e-007 |
| -0.13113 | 1.8e-007  | 2e-007    | 2.07e-007 |
| -0.13074 | 1.18e-007 | 1.86e-007 | 2.18e-007 |
| -0.13026 | 1.43e-007 | 1.99e-007 | 2.1e-007  |
| -0.12975 | 1.68e-007 | 2.08e-007 | 2.12e-007 |
| -0.12925 | 1.77e-007 | 2.19e-007 | 2.2e-007  |
| -0.12876 | 1.75e-007 | 1.97e-007 | 1.9e-007  |
| -0.12822 | 1.4e-007  | 1.78e-007 | 2.1e-007  |
| -0.12781 | 1.21e-007 | 2.15e-007 | 2.17e-007 |
| -0.12718 | 1.28e-007 | 1.81e-007 | 2.19e-007 |
| -0.12683 | 1.25e-007 | 2e-007    | 2.03e-007 |
| -0.12625 | 1.81e-007 | 1.63e-007 | 1.78e-007 |
| -0.12572 | 1.59e-007 | 2.01e-007 | 1.84e-007 |
| -0.12528 | 1.65e-007 | 1.87e-007 | 1.93e-007 |
| -0.12493 | 1.7e-007  | 1.85e-007 | 1.97e-007 |
| -0.12438 | 1.42e-007 | 1.68e-007 | 2.27e-007 |
| -0.1238  | 1.75e-007 | 1.79e-007 | 1.74e-007 |
| -0.12336 | 1.56e-007 | 2.05e-007 | 2.1e-007  |
| -0.12271 | 1.33e-007 | 1.76e-007 | 1.81e-007 |
| -0.12237 | 2.07e-007 | 1.69e-007 | 2.32e-007 |
| -0.12176 | 1.55e-007 | 1.88e-007 | 2.36e-007 |
| -0.12117 | 1.41e-007 | 1.81e-007 | 1.81e-007 |
| -0.12071 | 1.52e-007 | 1.84e-007 | 1.92e-007 |
| -0.1202  | 1.68e-007 | 2e-007    | 2.25e-007 |
| -0.11972 | 1.63e-007 | 1.72e-007 | 1.82e-007 |
| -0.11923 | 1.63e-007 | 1.51e-007 | 1.95e-007 |
| -0.11873 | 1.44e-007 | 1.68e-007 | 1.94e-007 |
| -0.11821 | 1.52e-007 | 2.43e-007 | 1.72e-007 |
| -0.11769 | 1.16e-007 | 1.92e-007 | 1.5e-007  |
| -0.11727 | 1.64e-007 | 1.81e-007 | 1.56e-007 |
| -0.11661 | 1.3e-007  | 2.01e-007 | 2.25e-007 |

|          |           |           |           |
|----------|-----------|-----------|-----------|
| -0.11624 | 1.26e-007 | 1.85e-007 | 2.05e-007 |
| -0.11571 | 1.76e-007 | 1.83e-007 | 1.98e-007 |
| -0.11528 | 1.26e-007 | 1.83e-007 | 2.23e-007 |
| -0.11464 | 1.47e-007 | 1.82e-007 | 1.74e-007 |
| -0.11416 | 1.53e-007 | 1.74e-007 | 1.7e-007  |
| -0.11371 | 1.8e-007  | 1.76e-007 | 1.68e-007 |
| -0.11324 | 1.28e-007 | 2.03e-007 | 1.68e-007 |
| -0.11272 | 1.81e-007 | 2.01e-007 | 1.97e-007 |
| -0.11221 | 1.25e-007 | 1.42e-007 | 1.75e-007 |
| -0.11166 | 1.27e-007 | 2.05e-007 | 1.6e-007  |
| -0.11127 | 1.78e-007 | 1.56e-007 | 1.99e-007 |
| -0.11076 | 1.16e-007 | 1.73e-007 | 1.83e-007 |
| -0.11021 | 1.6e-007  | 1.73e-007 | 1.95e-007 |
| -0.10961 | 1.41e-007 | 1.61e-007 | 1.76e-007 |
| -0.10904 | 1.65e-007 | 1.85e-007 | 1.92e-007 |
| -0.10861 | 1.31e-007 | 1.87e-007 | 1.29e-007 |
| -0.10821 | 1.31e-007 | 1.68e-007 | 2.04e-007 |
| -0.10768 | 1.51e-007 | 1.82e-007 | 1.48e-007 |
| -0.10727 | 1.33e-007 | 1.89e-007 | 1.67e-007 |
| -0.10669 | 1.79e-007 | 1.69e-007 | 2.01e-007 |
| -0.10612 | 1.5e-007  | 1.63e-007 | 1.8e-007  |
| -0.10563 | 1.61e-007 | 1.86e-007 | 2.17e-007 |
| -0.105   | 1.38e-007 | 1.47e-007 | 1.64e-007 |
| -0.10473 | 1.29e-007 | 1.87e-007 | 1.72e-007 |
| -0.10416 | 1.42e-007 | 1.42e-007 | 1.94e-007 |
| -0.10365 | 1.5e-007  | 1.42e-007 | 1.5e-007  |
| -0.1031  | 1.25e-007 | 1.68e-007 | 1.72e-007 |
| -0.10271 | 1.34e-007 | 1.72e-007 | 1.69e-007 |
| -0.10208 | 1.38e-007 | 1.69e-007 | 1.73e-007 |
| -0.1016  | 1.55e-007 | 2.01e-007 | 1.7e-007  |
| -0.10107 | 1.62e-007 | 1.72e-007 | 1.6e-007  |
| -0.10068 | 1.43e-007 | 2.01e-007 | 2.13e-007 |
| -0.10009 | 1.78e-007 | 1.72e-007 | 1.45e-007 |
| -0.09952 | 1.59e-007 | 1.59e-007 | 1.94e-007 |
| -0.09909 | 1.82e-007 | 1.52e-007 | 1.46e-007 |
| -0.0987  | 1.25e-007 | 1.5e-007  | 1.65e-007 |
| -0.09815 | 1.32e-007 | 1.42e-007 | 1.54e-007 |
| -0.09758 | 1.36e-007 | 1.62e-007 | 1.66e-007 |
| -0.09715 | 1.33e-007 | 1.55e-007 | 1.68e-007 |
| -0.09665 | 1.18e-007 | 1.44e-007 | 1.65e-007 |
| -0.09613 | 1.33e-007 | 1.53e-007 | 1.94e-007 |
| -0.09564 | 1.14e-007 | 1.4e-007  | 1.61e-007 |
| -0.09523 | 1.26e-007 | 1.46e-007 | 1.77e-007 |



|          |           |           |           |
|----------|-----------|-----------|-----------|
| -0.09473 | 1.43e-007 | 1.69e-007 | 1.37e-007 |
| -0.09433 | 1.12e-007 | 1.7e-007  | 1.61e-007 |
| -0.0937  | 1.38e-007 | 1.77e-007 | 1.62e-007 |
| -0.09323 | 1.33e-007 | 1.57e-007 | 1.39e-007 |
| -0.09268 | 1.34e-007 | 1.5e-007  | 1.76e-007 |
| -0.09223 | 1.39e-007 | 2.04e-007 | 1.75e-007 |
| -0.09156 | 1.36e-007 | 1.51e-007 | 1.73e-007 |
| -0.09119 | 1.49e-007 | 1.62e-007 | 1.71e-007 |
| -0.09069 | 1.15e-007 | 1.56e-007 | 1.88e-007 |
| -0.0902  | 1.21e-007 | 1.58e-007 | 1.85e-007 |
| -0.08971 | 7.58e-008 | 1.11e-007 | 1.62e-007 |
| -0.08905 | 1.35e-007 | 1.61e-007 | 1.75e-007 |
| -0.08872 | 1.64e-007 | 1.24e-007 | 1.67e-007 |
| -0.08822 | 1.18e-007 | 1.38e-007 | 1.79e-007 |
| -0.08769 | 1.45e-007 | 1.37e-007 | 1.56e-007 |
| -0.08722 | 1.23e-007 | 1.44e-007 | 1.72e-007 |
| -0.08666 | 1.12e-007 | 1.42e-007 | 2.09e-007 |
| -0.08618 | 1.37e-007 | 1.33e-007 | 1.68e-007 |
| -0.08564 | 1.61e-007 | 1.73e-007 | 1.28e-007 |
| -0.0852  | 1.45e-007 | 1.8e-007  | 1.53e-007 |
| -0.08466 | 1.63e-007 | 1.38e-007 | 1.43e-007 |
| -0.08408 | 1.47e-007 | 1.48e-007 | 1.44e-007 |
| -0.08375 | 1.72e-007 | 1.59e-007 | 1.83e-007 |
| -0.08305 | 1.54e-007 | 1.41e-007 | 1.79e-007 |
| -0.08265 | 1.09e-007 | 1.29e-007 | 1.45e-007 |
| -0.0822  | 1.37e-007 | 1.45e-007 | 1.55e-007 |
| -0.08175 | 1.06e-007 | 1.18e-007 | 1.75e-007 |
| -0.08111 | 1.37e-007 | 1.53e-007 | 1.36e-007 |
| -0.08064 | 1.36e-007 | 1.58e-007 | 1.55e-007 |
| -0.08017 | 1.33e-007 | 1.44e-007 | 1.49e-007 |
| -0.0798  | 1.39e-007 | 1.55e-007 | 1.41e-007 |
| -0.0792  | 1.42e-007 | 1.8e-007  | 1.57e-007 |
| -0.07874 | 1.08e-007 | 1.54e-007 | 1.59e-007 |
| -0.07827 | 1.52e-007 | 1.39e-007 | 1.8e-007  |
| -0.07769 | 1.45e-007 | 1.34e-007 | 1.36e-007 |
| -0.07715 | 1.38e-007 | 1.53e-007 | 1.52e-007 |
| -0.07675 | 1.35e-007 | 1.23e-007 | 1.36e-007 |
| -0.0763  | 1.37e-007 | 1.75e-007 | 1.25e-007 |
| -0.07572 | 1.37e-007 | 1.47e-007 | 1.59e-007 |
| -0.07522 | 1.19e-007 | 1.49e-007 | 1.52e-007 |
| -0.07475 | 1.49e-007 | 1.42e-007 | 1.49e-007 |
| -0.07414 | 1.21e-007 | 1.62e-007 | 1.53e-007 |
| -0.07357 | 1.43e-007 | 1.48e-007 | 1.7e-007  |

|          |           |           |           |
|----------|-----------|-----------|-----------|
| -0.07318 | 1.38e-007 | 1.66e-007 | 1.54e-007 |
| -0.07264 | 1.42e-007 | 1.46e-007 | 1.57e-007 |
| -0.0721  | 1.23e-007 | 1.22e-007 | 1.53e-007 |
| -0.07163 | 1.65e-007 | 1.22e-007 | 1.78e-007 |
| -0.07114 | 1.51e-007 | 1.47e-007 | 1.61e-007 |
| -0.07067 | 1.51e-007 | 1.45e-007 | 1.41e-007 |
| -0.07014 | 1.32e-007 | 1.59e-007 | 1.72e-007 |
| -0.06963 | 1.21e-007 | 1.65e-007 | 1.44e-007 |
| -0.06912 | 1.27e-007 | 1.4e-007  | 1.75e-007 |
| -0.06868 | 1.33e-007 | 1.58e-007 | 1.62e-007 |
| -0.0683  | 1.26e-007 | 1.51e-007 | 1.61e-007 |
| -0.06759 | 1.17e-007 | 1.46e-007 | 2.07e-007 |
| -0.06713 | 1.48e-007 | 1.5e-007  | 1.57e-007 |
| -0.06643 | 1.44e-007 | 1.8e-007  | 1.62e-007 |
| -0.06603 | 1.45e-007 | 1.76e-007 | 1.57e-007 |
| -0.06565 | 1.48e-007 | 1.49e-007 | 1.62e-007 |
| -0.06501 | 1.24e-007 | 1.33e-007 | 1.58e-007 |
| -0.06462 | 1.33e-007 | 1.48e-007 | 1.57e-007 |
| -0.06404 | 1.3e-007  | 1.72e-007 | 1.56e-007 |
| -0.06369 | 1.56e-007 | 1.24e-007 | 1.39e-007 |
| -0.06319 | 1.18e-007 | 1.59e-007 | 1.5e-007  |
| -0.06258 | 1.11e-007 | 1.67e-007 | 1.87e-007 |
| -0.0621  | 1.42e-007 | 1.58e-007 | 1.58e-007 |
| -0.06168 | 1.45e-007 | 1.43e-007 | 1.66e-007 |
| -0.06107 | 1.36e-007 | 1.69e-007 | 1.99e-007 |
| -0.06061 | 1.31e-007 | 1.66e-007 | 1.84e-007 |
| -0.06021 | 1.17e-007 | 1.52e-007 | 1.86e-007 |
| -0.05963 | 1.41e-007 | 1.39e-007 | 1.46e-007 |
| -0.05908 | 1.17e-007 | 1.6e-007  | 1.66e-007 |
| -0.05865 | 1.69e-007 | 1.11e-007 | 1.55e-007 |
| -0.05811 | 1.13e-007 | 1.51e-007 | 1.78e-007 |
| -0.05754 | 1.41e-007 | 1.53e-007 | 1.56e-007 |
| -0.05709 | 1.7e-007  | 1.56e-007 | 1.39e-007 |
| -0.05659 | 1.26e-007 | 1.15e-007 | 1.41e-007 |
| -0.05614 | 1.39e-007 | 1.61e-007 | 1.39e-007 |
| -0.05563 | 1.42e-007 | 1.48e-007 | 1.75e-007 |
| -0.05502 | 1.41e-007 | 1.46e-007 | 1.74e-007 |
| -0.05448 | 1.38e-007 | 1.65e-007 | 1.46e-007 |
| -0.05404 | 1.24e-007 | 1.34e-007 | 1.85e-007 |
| -0.05351 | 1.28e-007 | 1.39e-007 | 1.4e-007  |
| -0.05299 | 1.52e-007 | 1.66e-007 | 1.45e-007 |
| -0.05265 | 1.51e-007 | 1.58e-007 | 1.76e-007 |
| -0.05201 | 1.47e-007 | 1.9e-007  | 1.54e-007 |

|          |           |           |           |
|----------|-----------|-----------|-----------|
| -0.0516  | 1.36e-007 | 1.36e-007 | 1.69e-007 |
| -0.05111 | 1.46e-007 | 9.76e-008 | 1.43e-007 |
| -0.05042 | 1.2e-007  | 1.38e-007 | 1.47e-007 |
| -0.04995 | 1.42e-007 | 1.37e-007 | 1.4e-007  |
| -0.04959 | 1.51e-007 | 1.48e-007 | 1.32e-007 |
| -0.04897 | 1.15e-007 | 1.25e-007 | 1.27e-007 |
| -0.0486  | 1.41e-007 | 1.23e-007 | 1.7e-007  |
| -0.04791 | 1.53e-007 | 1.72e-007 | 1.48e-007 |
| -0.04742 | 1.49e-007 | 1.45e-007 | 1.27e-007 |
| -0.04708 | 1.27e-007 | 1.44e-007 | 1.43e-007 |
| -0.04662 | 1.41e-007 | 1.53e-007 | 1.89e-007 |
| -0.04616 | 1.37e-007 | 1.67e-007 | 1.45e-007 |
| -0.04554 | 1.51e-007 | 1.25e-007 | 1.67e-007 |
| -0.04515 | 1.24e-007 | 1.56e-007 | 1.76e-007 |
| -0.04448 | 1.5e-007  | 1.96e-007 | 1.67e-007 |
| -0.04408 | 1.38e-007 | 1.29e-007 | 1.59e-007 |
| -0.04361 | 1.4e-007  | 1.61e-007 | 1.61e-007 |
| -0.04323 | 1.17e-007 | 1.71e-007 | 1.35e-007 |
| -0.04254 | 1.29e-007 | 1.71e-007 | 1.92e-007 |
| -0.04209 | 9.54e-008 | 1.41e-007 | 1.52e-007 |
| -0.04162 | 1.6e-007  | 1.77e-007 | 1.48e-007 |
| -0.04109 | 1.6e-007  | 1.64e-007 | 1.4e-007  |
| -0.04057 | 1.6e-007  | 1.35e-007 | 1.41e-007 |
| -0.04019 | 1.17e-007 | 1.22e-007 | 1.59e-007 |
| -0.03944 | 1.55e-007 | 1.64e-007 | 1.63e-007 |
| -0.0391  | 1.29e-007 | 1.77e-007 | 1.75e-007 |
| -0.03857 | 1.36e-007 | 1.54e-007 | 1.49e-007 |
| -0.03797 | 1.53e-007 | 1.59e-007 | 1.79e-007 |
| -0.03741 | 1.15e-007 | 1.32e-007 | 1.27e-007 |
| -0.03703 | 1.33e-007 | 1.6e-007  | 1.7e-007  |
| -0.03653 | 1.46e-007 | 1.44e-007 | 1.63e-007 |
| -0.03613 | 1.41e-007 | 1.62e-007 | 1.58e-007 |
| -0.03551 | 1.43e-007 | 1.62e-007 | 1.83e-007 |
| -0.03491 | 1.56e-007 | 1.61e-007 | 1.5e-007  |
| -0.03452 | 1.39e-007 | 1.75e-007 | 1.38e-007 |
| -0.03399 | 1.4e-007  | 1.93e-007 | 1.5e-007  |
| -0.03355 | 1.4e-007  | 1.8e-007  | 1.88e-007 |
| -0.03312 | 1.3e-007  | 1.45e-007 | 2.03e-007 |
| -0.03251 | 1.31e-007 | 1.39e-007 | 1.76e-007 |
| -0.03206 | 1.61e-007 | 1.57e-007 | 1.85e-007 |
| -0.03164 | 1.46e-007 | 1.61e-007 | 1.51e-007 |
| -0.03119 | 1.45e-007 | 1.45e-007 | 1.72e-007 |
| -0.03059 | 1.4e-007  | 1.55e-007 | 1.64e-007 |

|          |           |           |           |
|----------|-----------|-----------|-----------|
| -0.03007 | 1.13e-007 | 1.72e-007 | 1.93e-007 |
| -0.0296  | 1.67e-007 | 1.45e-007 | 1.94e-007 |
| -0.029   | 1.22e-007 | 1.83e-007 | 1.68e-007 |
| -0.02856 | 1.59e-007 | 1.4e-007  | 1.85e-007 |
| -0.02792 | 1.41e-007 | 1.77e-007 | 1.77e-007 |
| -0.02764 | 1.33e-007 | 1.47e-007 | 1.32e-007 |
| -0.02702 | 1.7e-007  | 1.7e-007  | 1.52e-007 |
| -0.02663 | 1.27e-007 | 1.59e-007 | 1.46e-007 |
| -0.02596 | 1.58e-007 | 1.58e-007 | 1.63e-007 |
| -0.02556 | 1.73e-007 | 1.44e-007 | 1.54e-007 |
| -0.02497 | 1.26e-007 | 1.89e-007 | 1.67e-007 |
| -0.02452 | 1.53e-007 | 1.73e-007 | 1.7e-007  |
| -0.02401 | 1.32e-007 | 1.51e-007 | 1.45e-007 |
| -0.02357 | 1.41e-007 | 1.91e-007 | 1.79e-007 |
| -0.02324 | 1.46e-007 | 1.67e-007 | 1.59e-007 |
| -0.02277 | 1.53e-007 | 1.29e-007 | 1.79e-007 |
| -0.02225 | 1.59e-007 | 1.81e-007 | 1.91e-007 |
| -0.02168 | 1.42e-007 | 1.69e-007 | 1.78e-007 |
| -0.02122 | 1.83e-007 | 1.69e-007 | 1.55e-007 |
| -0.02077 | 1.36e-007 | 1.42e-007 | 1.85e-007 |
| -0.02017 | 1.4e-007  | 1.71e-007 | 1.62e-007 |
| -0.01969 | 1.49e-007 | 1.26e-007 | 1.76e-007 |
| -0.01935 | 1.34e-007 | 1.61e-007 | 1.61e-007 |
| -0.01873 | 1.37e-007 | 1.68e-007 | 1.7e-007  |
| -0.01817 | 1.2e-007  | 1.82e-007 | 1.8e-007  |
| -0.01778 | 1.14e-007 | 1.63e-007 | 1.6e-007  |
| -0.01711 | 1.33e-007 | 2.01e-007 | 1.54e-007 |
| -0.01672 | 1.53e-007 | 1.48e-007 | 1.72e-007 |
| -0.0162  | 1.61e-007 | 1.95e-007 | 2.1e-007  |
| -0.01564 | 1.51e-007 | 2.09e-007 | 1.58e-007 |
| -0.01524 | 1.51e-007 | 1.75e-007 | 1.57e-007 |
| -0.01467 | 1.49e-007 | 1.59e-007 | 1.7e-007  |
| -0.0142  | 1.24e-007 | 1.74e-007 | 1.92e-007 |
| -0.01379 | 1.57e-007 | 1.59e-007 | 1.93e-007 |
| -0.01317 | 1.6e-007  | 1.69e-007 | 1.96e-007 |
| -0.01274 | 9.9e-008  | 1.98e-007 | 1.63e-007 |
| -0.01213 | 1.48e-007 | 1.5e-007  | 1.72e-007 |
| -0.01167 | 1.24e-007 | 1.63e-007 | 1.99e-007 |
| -0.01115 | 1.66e-007 | 1.59e-007 | 1.95e-007 |
| -0.01072 | 1.78e-007 | 1.93e-007 | 2e-007    |
| -0.01017 | 1.19e-007 | 1.32e-007 | 1.36e-007 |
| -0.0098  | 1.7e-007  | 1.93e-007 | 1.87e-007 |
| -0.00932 | 1.43e-007 | 1.74e-007 | 1.89e-007 |

|          |           |           |           |
|----------|-----------|-----------|-----------|
| -0.00872 | 1.3e-007  | 1.45e-007 | 1.7e-007  |
| -0.00823 | 1.82e-007 | 1.68e-007 | 1.83e-007 |
| -0.00768 | 1.39e-007 | 1.86e-007 | 1.89e-007 |
| -0.0073  | 1.63e-007 | 1.81e-007 | 1.64e-007 |
| -0.00671 | 1.23e-007 | 2.04e-007 | 1.95e-007 |
| -0.00618 | 1.36e-007 | 1.78e-007 | 2.18e-007 |
| -0.00556 | 1.43e-007 | 1.45e-007 | 2e-007    |
| -0.00513 | 1.19e-007 | 1.79e-007 | 1.85e-007 |
| -0.0047  | 1.45e-007 | 1.23e-007 | 1.98e-007 |
| -0.0043  | 1.73e-007 | 2.08e-007 | 1.89e-007 |
| -0.00355 | 1.3e-007  | 1.84e-007 | 1.39e-007 |
| -0.00312 | 1.45e-007 | 2.11e-007 | 1.84e-007 |
| -0.00278 | 1.24e-007 | 1.74e-007 | 1.61e-007 |
| -0.00227 | 1.79e-007 | 1.77e-007 | 1.58e-007 |
| -0.00163 | 1.53e-007 | 1.66e-007 | 1.71e-007 |
| -0.00114 | 1.41e-007 | 1.65e-007 | 2.14e-007 |
| -0.00062 | 1.69e-007 | 1.56e-007 | 2.16e-007 |
| -0.00017 | 1.86e-007 | 1.75e-007 | 1.67e-007 |

**Table S4.** Normalized voltametric peak height titration data for **Figure 3a**.

| [ENOX2], nM | Replicate #1 | Replicate #2 | Trial 3      |
|-------------|--------------|--------------|--------------|
| 0.1         | 9.1e-007     | 8.9057e-007  | 9.1236e-007  |
| 0.3         | 9e-007       | 8.99668e-007 | 8.99628e-007 |
| 1           | 8.42e-007    | 8.46173e-007 | 8.2243e-007  |
| 3           | 7.75e-007    | 8.09318e-007 | 7.54015e-007 |
| 10          | 7.23e-007    | 7.70411e-007 | 6.80556e-007 |
| 30          | 6.88e-007    | 7.03925e-007 | 6.43682e-007 |
| 100         | 6.49e-007    | 6.70999e-007 | 6.00069e-007 |
| 200         | 5.98e-007    | 5.90073e-007 | 5.59311e-007 |

**Table S5.** voltametric data for off-target analysis for **Figure 3b**.

| ENOX         | BSA      | TBP      |
|--------------|----------|----------|
| 3.02e-007    | 7.4e-008 | 6.6e-008 |
| 3.09595e-007 | 5.3e-008 | 1.9e-008 |
| 3.40317e-007 | 3.1e-008 | 1.8e-008 |
